# Supplementary material for: Recent trends in daily rainfall extremes over Montenegro (1951–2010)
Source: Copernicus journal article supplement (doi:10.5194/nhess-15-2069-2015), 2015-09-16
Supplement: Supplementary file 1 [file nhess-15-2069-2015-supplement.pdf]

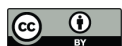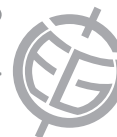

## *Supplement of*

## **Recent trends in daily rainfall extremes over Montenegro (1951–2010)**

**D. Burić et al.**

*Correspondence to:* J. Luković (jlukovic@gef.bg.ac.rs)

The copyright of individual parts of the supplement might differ from the CC-BY 3.0 licence.

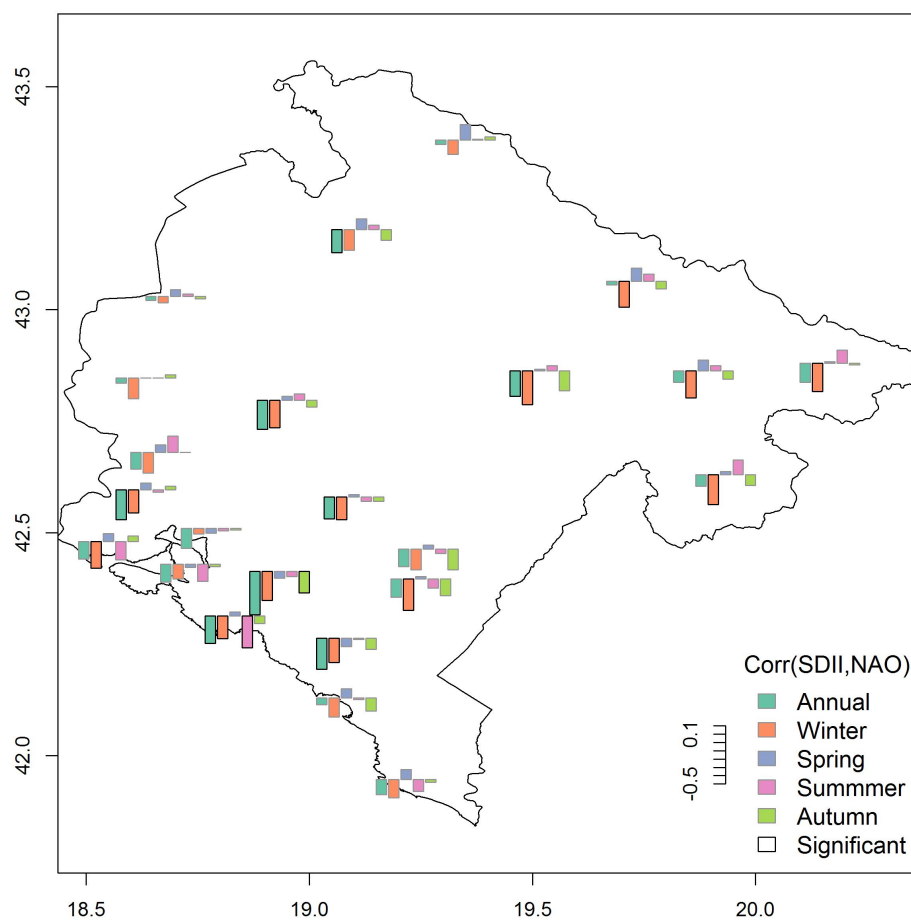

Fig. S1. Mapped correlation between annual and seasonal SDII and NAO index

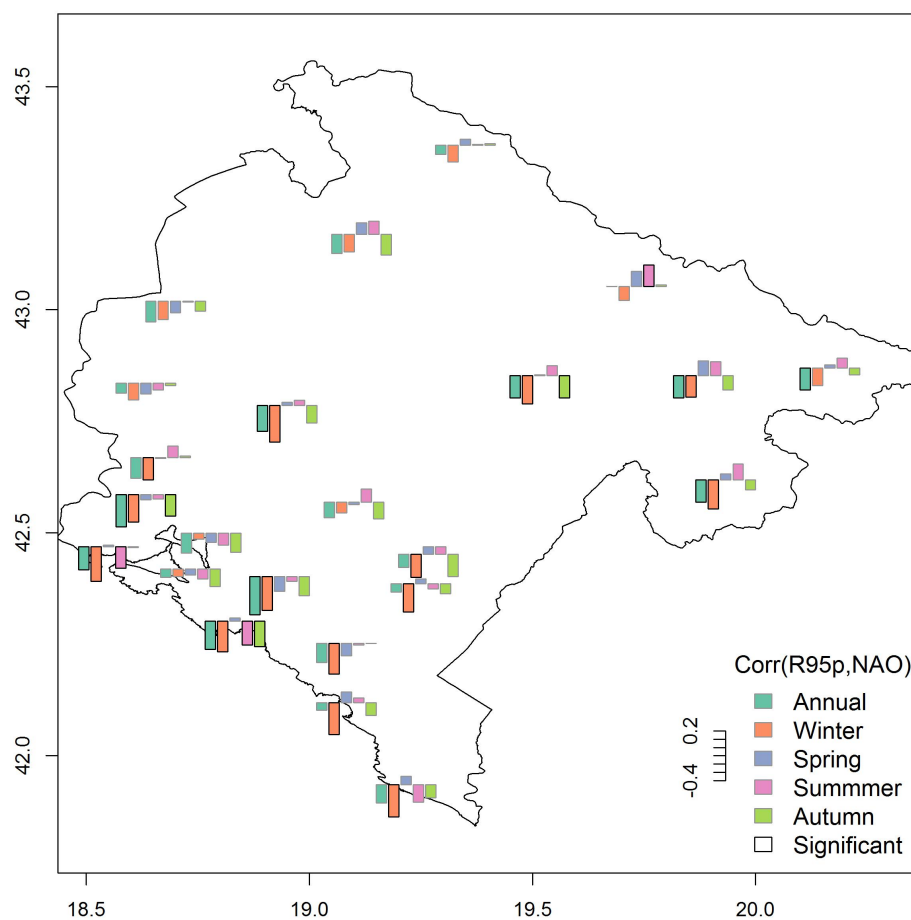

Fig. S2. Mapped correlation between annual and seasonal R95p and NAO index

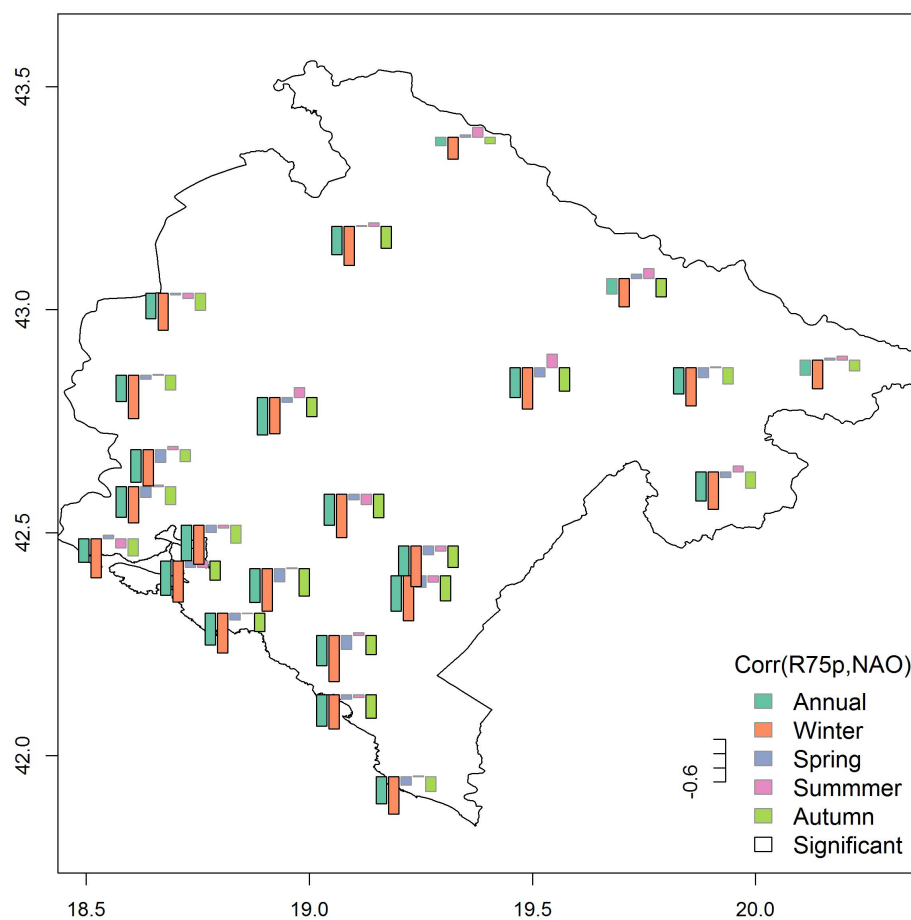

Fig. S3. Mapped correlation between annual and seasonal R75p and NAO index

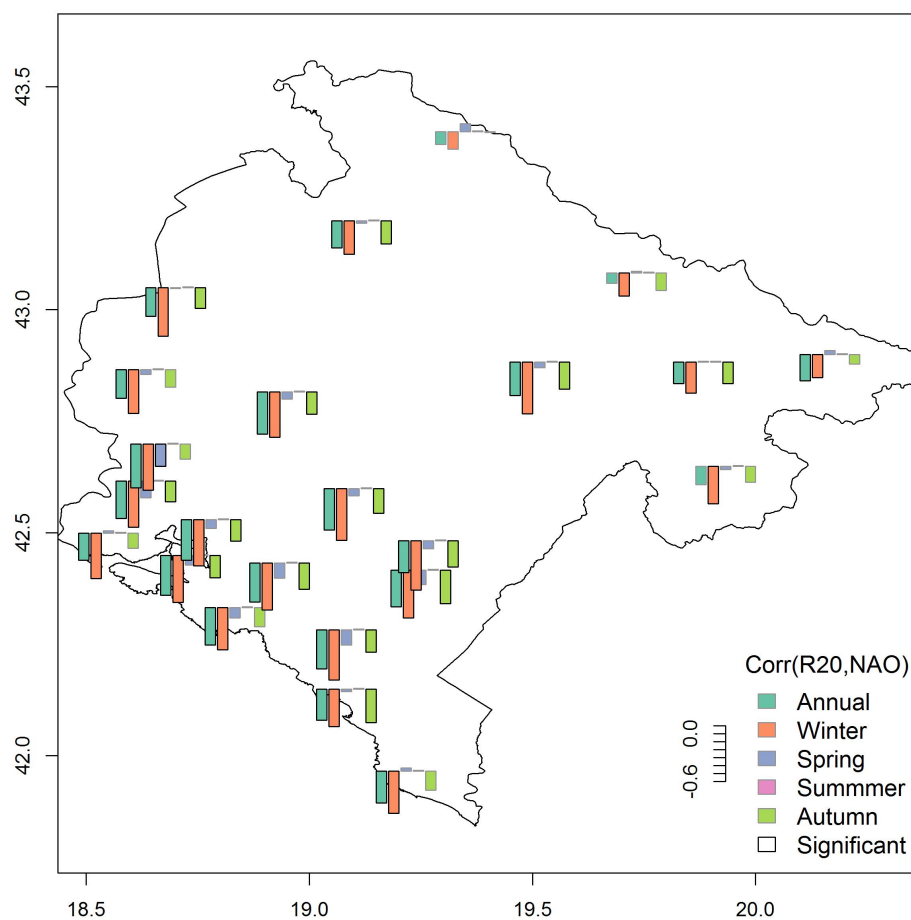

Fig. S4. Mapped correlation between annual and seasonal R20mm and NAO index

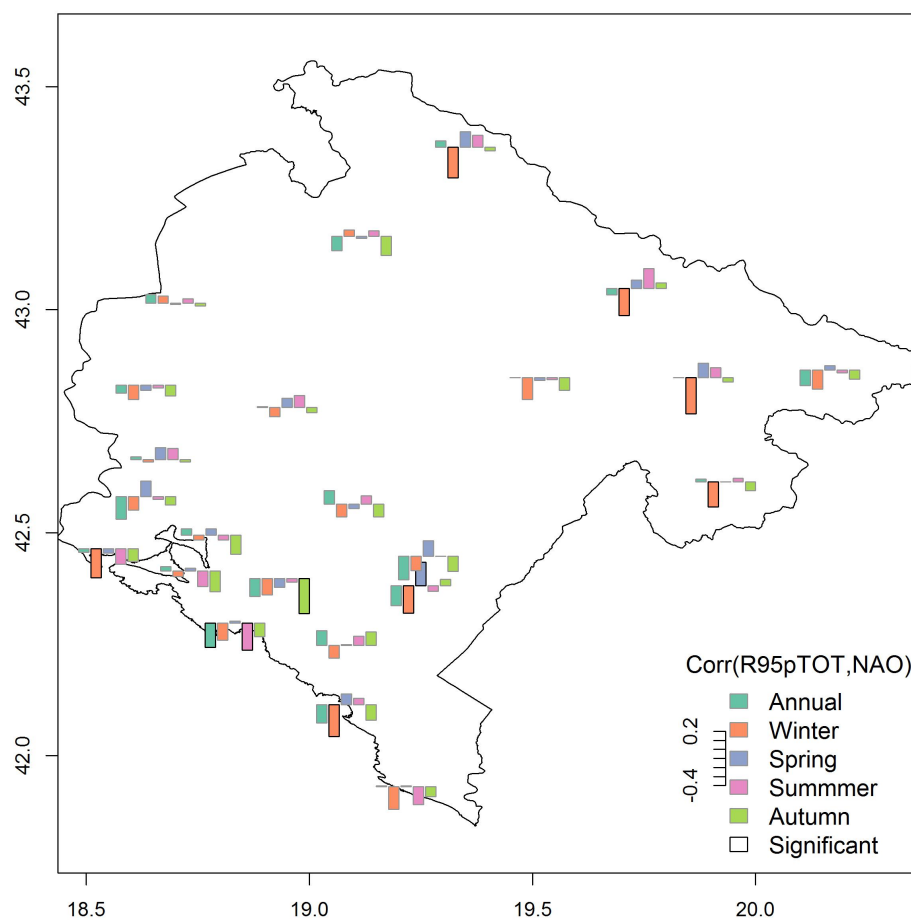

Fig. S5. Mapped correlation between annual and seasonal R95pTOT and NAO index
